# Supplementary material for: Isolation and Molecular Characterization of Enteroviruses from Great Apes and Humans in the Republic of Congo: Recombination within Enterovirus C Serotypes
Source: Preprints.org preprint supplement (doi:10.20944/preprints202009.0035.v1), 2020-09-02
Supplement: Supplementary file 1 [file supplementary]

**Table S2.** Number and prevalence of humans and gorillas infected with enteroviruses

| Species | Site/Town | Number of individuals |  | Number of infected individuals | Percentage of  infected individuals |
| --- | --- | --- | --- | --- | --- |
| Gorillas co-habiting humans | GLLNR | 12 |  | 2 | 16.67 |
| Gorillas non co-habiting humans | OKNP and NNNP | 5 |  | 3 | 60 |
| Total |  | 17 |  | 5 | 29.41 |
| Human | Lesio-Louna eco-guards | 3 |  | 1 | 33.33 |
| Mbomo Local population | 35 |  | 4 | 11.42 |
| Total |  | 38 |  | 5 | 13.15 |
