# Supplementary material for: Isolation and Molecular Characterization of Enteroviruses from Great Apes and Humans in the Republic of Congo: Recombination within Enterovirus C Serotypes
Source: Preprints.org preprint supplement (doi:10.20944/preprints202009.0035.v1), 2020-09-02
Supplement: Supplementary file 2 [file Table S1.docx]

**Table S1**. Distribution of great ape individuals by collection sites

| Sites | Number of fecal samples | | | Number of individuals | |  |
| --- | --- | --- | --- | --- | --- | --- |
| Gorilla | Chimpanzee | Total | Gorilla | Chimpanzee | Total |
| OKNP | 9 | 1 | 10 | 4 | 1 | 5 |
| NNNP | 1 | 0 | 1 | 1 | 0 | 1 |
| GLLNR | 12 | 0 | 12 | 12 | 0 | 12 |
| Total | 22 | 1 | 23 | 17 | 1 | 18 |
